# Supplementary material for: The KOF Globalisation Index – revisited
Source: Springer Nature journal article supplement (doi:10.1007/s11558-019-09344-2), 2019-01-28
Supplement: MOESM1 [file 16426056]

# Appendix

Table A.1: Overview of all variables used to construct the KOF Globalisation Indices

| Dimension                                    | Variable Name                       | Variable Definitions                                                                                                                                               | Source                                                   |
|----------------------------------------------|-------------------------------------|--------------------------------------------------------------------------------------------------------------------------------------------------------------------|----------------------------------------------------------|
| <i>Trade Globalisation, de facto</i>         | Trade in goods                      | Exports and imports of goods (% of GDP).                                                                                                                           | World Bank WDI (2018)                                    |
|                                              | Trade in services                   | Exports and imports of services (% of GDP).                                                                                                                        | World Bank WDI (2018)                                    |
|                                              | Trade partner diversity             | Average of the Herfindahl-Hirschman market concentration index for exports and imports of goods (inverted).                                                        | IMF DOTS (2018a) and own calculations                    |
| <i>Trade Globalisation, de jure</i>          | Trade regulations                   | Average of two subcomponents: Prevalence of non-tariff trade barriers and compliance costs of importing and exporting.                                             | Gwartney et al. (2018)                                   |
|                                              | Trade taxes                         | Income from taxes on international trade as percentage of revenue (inverted).                                                                                      | World Bank WDI (2018)                                    |
|                                              | Tariffs                             | Unweighted mean of tariff rates.                                                                                                                                   | Gwartney et al. (2018)                                   |
|                                              | Trade agreements                    | Number of bilateral and multilateral free trade agreements.                                                                                                        | Egger and Larch (2008) and WTO (various years)           |
| <i>Financial Globalisation, de facto</i>     | Foreign direct investment           | Sum of stocks of assets and liabilities of foreign direct investments (% of GDP).                                                                                  | Lane and Milesi-Ferretti (2018) and IMF IIP (2018b)      |
|                                              | Portfolio investment                | Sum of stocks of assets and liabilities of international equity portfolio investments (% of GDP).                                                                  | Lane and Milesi-Ferretti (2018) and IMF IIP (2018b)      |
|                                              | International debt                  | Sum of inward and outward stocks of international portfolio debt securities and international bank loans and deposits (% of GDP).                                  | Lane and Milesi-Ferretti (2018) and IMF IIP (2018b)      |
|                                              | International reserves              | Includes foreign exchange (excluding gold), SDR holdings and reserve position in the IMF (% of GDP).                                                               | Lane and Milesi-Ferretti (2018) and IMF IIP (2018b)      |
|                                              | International income payments       | Sum of capital and labour income to foreign nationals and from abroad (% of GDP).                                                                                  | World Bank WDI (2018)                                    |
| <i>Financial Globalisation, de jure</i>      | Investment restrictions             | Prevalence of foreign ownership and regulations to international capital flows.                                                                                    | Gwartney et al. (2018)                                   |
|                                              | Capital account openness            | Chinn-Ito index of capital account openness.                                                                                                                       | Chinn, Ito (2006, 2008)                                  |
|                                              | International investment agreements | Number of Bilateral Investment Agreements (BITs) and Treaties with Investment Provisions (TIPs).                                                                   | UNCTAD (2018)                                            |
| <i>Interpersonal Globalisation, de facto</i> | International voice traffic         | International incoming and outgoing fixed and mobile telephone traffic in minutes (% of population).                                                               | ITU (2018)                                               |
|                                              | Transfers                           | Secondary income paid and received. Gross inflows and outflows of goods, services, income or financial items without a quid pro quo (% of population).             | World Bank WDI (2018)                                    |
|                                              | International tourism               | Arrivals and departures of international tourists (% of population).                                                                                               | World Bank WDI (2018)                                    |
|                                              | International students              | Inbound and outbound number of tertiary students (% of population).                                                                                                | World Bank WDI (2018)                                    |
|                                              | Migration                           | Number of foreign or foreign-born residents (% of population).                                                                                                     | World Bank WDI (2018)                                    |
| <i>Interpersonal Globalisation, de jure</i>  | Telephone subscriptions             | Fixed telephone and mobile subscriptions (% of population).                                                                                                        | World Bank WDI (2018)                                    |
|                                              | Freedom to visit                    | Percentage of countries for which a country requires a visa from foreign visitors.                                                                                 | Czaika et al. (2018) and IATA (2018)                     |
|                                              | International airports              | Number of airports that offers at least one international flight connection (% of population).                                                                     | ICAO (2018)                                              |
|                                              | Used internet bandwidth             | Total used capacity of international internet bandwidth in bits per second (% of population).                                                                      | ITU (2018)                                               |
| <i>Informational Globalisation, de facto</i> | International patents               | Patent applications by non residents filed through the Patent Cooperation Treaty procedure or with a national patent office (% of population).                     | World Bank WDI (2018)                                    |
|                                              | High technology exports             | Exports of high R&D intensity products in current US\$ (% of population).                                                                                          | World Bank WDI (2018)                                    |
|                                              | Television access                   | Share of households with a television set.                                                                                                                         | ITU (2018)                                               |
| <i>Informational Globalisation, de jure</i>  | Internet access                     | Individuals using the internet (% of population).                                                                                                                  | World Bank WDI (2018)                                    |
|                                              | Press freedom                       | Quantification of the legal environment for the media, political pressure that influence reporting and economic factor that affect access to news and information. | Freedom House (2018a)                                    |
| <i>Cultural Globalisation, de facto</i>      | Trade in cultural goods             | Exports and imports of cultural goods defined as in UNESCO (2009) (% of population).                                                                               | UN Comtrade (2018)                                       |
|                                              | Trade in personal services          | Exports and imports of personal, cultural and recreational services (% of population).                                                                             | IMF BOPS (2018c)                                         |
|                                              | International trademarks            | Applications to register a trademark with a national or regional Intellectual Property (IP) office by non residents in percent of all applications.                | World Bank WDI (2018)                                    |
| <i>Cultural Globalisation, de jure</i>       | McDonald's restaurant               | Number of McDonald's restaurants (% of population).                                                                                                                | McDonald's (various years)                               |
|                                              | IKEA stores                         | Number of IKEA stores (% of population)                                                                                                                            | IKEA (various years)                                     |
|                                              | Gender parity                       | Ratio of girls to boys enrolled in primary education level in public and private schools.                                                                          | World Bank WDI (2018)                                    |
|                                              | Human capital                       | Human capital index based on the average years of schooling and an assumed rate of return to education.                                                            | Feenstra et al. (2015) / Penn World Table 9.0            |
|                                              | Civil liberties                     | Quantification of aspects on freedom of expression and belief, associational and organizational rights, rule of law and personal autonomy and individual rights.   | Freedom House (2018b)                                    |
| <i>Political Globalisation, de facto</i>     | Embassies                           | Absolute number of embassies in a country.                                                                                                                         | Europe World Yearbook (various years)                    |
|                                              | UN peace keeping missions           | Personnel contributed to U.N. Security Council Missions (% of population).                                                                                         | UN Department of Peacekeeping Operations (various years) |
|                                              | International NGOs                  | Number of internationally oriented nongovernmental organisations (NGO) operating in that country.                                                                  | Yearbook of International Organizations (various years)  |
| <i>Political Globalisation, de jure</i>      | International organisations         | Number of international inter-governmental organisations in which a country is member.                                                                             | CIA World Factbook (various years)                       |
|                                              | International treaties              | International treaties signed between two or more states and ratified by the highest legislative body of each country since 1945.                                  | United Nations Treaty Collection (various years)         |
|                                              | Treaty partner diversity            | Number of distinct treaty partners of a country with bilateral investment treaties (BITs).                                                                         | UNCTAD (2018)                                            |

Table A.2: Coverage ratios of variables for selected years (in percent)

| Variable                            | 1975        | 1985        | 1995        | 2005        | 2015        |
|-------------------------------------|-------------|-------------|-------------|-------------|-------------|
| Trade in goods                      | 59.6        | 72.4        | 89.7        | 92.6        | 91.1        |
| Trade in services                   | 24.6        | 59.6        | 70.4        | 83.7        | 83.7        |
| Trade partner diversity             | 62.1        | 75.9        | 87.7        | 96.1        | 97.0        |
| Trade regulations                   | 0.0         | 0.0         | 25.1        | 68.0        | 77.8        |
| Trade taxes                         | 23.6        | 26.1        | 48.3        | 60.1        | 50.2        |
| Tariffs                             | 13.8        | 46.3        | 48.3        | 69.0        | 77.3        |
| Trade agreements                    | 100.0       | 100.0       | 100.0       | 100.0       | 100.0       |
| Foreign direct investment           | 50.7        | 67.5        | 85.7        | 91.6        | 89.7        |
| Portfolio investment                | 48.3        | 65.5        | 85.2        | 92.6        | 88.2        |
| International debt                  | 50.2        | 67.5        | 87.2        | 94.1        | 89.7        |
| International reserves              | 52.2        | 68.0        | 86.7        | 92.1        | 89.7        |
| International income payments       | 24.6        | 59.6        | 70.4        | 83.7        | 83.7        |
| Investment restrictions             | 0.0         | 0.0         | 25.1        | 58.1        | 74.4        |
| Capital account openness            | 53.7        | 69.0        | 74.9        | 87.7        | 85.7        |
| International Investment Agreements | 100.0       | 100.0       | 100.0       | 100.0       | 100.0       |
| International voice traffic         | 0.5         | 1.0         | 1.0         | 26.1        | 66.0        |
| Transfers                           | 26.6        | 64.0        | 70.9        | 83.7        | 85.2        |
| International tourism               | 0.0         | 0.0         | 86.7        | 93.1        | 89.2        |
| International students              | 0.0         | 0.0         | 0.0         | 95.1        | 96.6        |
| Migration                           | 87.7        | 87.7        | 99.5        | 99.5        | 99.5        |
| Telephone subscriptions             | 73.9        | 90.6        | 95.6        | 97.0        | 98.5        |
| Freedom to visit                    | 75.9        | 76.4        | 87.2        | 89.7        | 0.0         |
| International airports              | 0.0         | 0.0         | 0.0         | 95.6        | 95.6        |
| Used internet bandwidth             | 0.0         | 0.0         | 18.7        | 91.1        | 94.6        |
| International patents               | 37.4        | 41.4        | 51.2        | 49.3        | 55.7        |
| High technology exports             | 0.0         | 0.0         | 54.2        | 77.3        | 68.5        |
| Television access                   | 13.8        | 24.1        | 66.5        | 86.2        | 11.8        |
| Internet access                     | 0.0         | 0.0         | 62.6        | 96.6        | 98.5        |
| Press freedom                       | 0.0         | 0.0         | 90.1        | 93.1        | 94.1        |
| Trade in cultural goods             | 0.0         | 0.0         | 54.7        | 81.3        | 74.9        |
| Trade in personal services          | 0.0         | 0.0         | 0.0         | 60.6        | 71.4        |
| International trademarks            | 38.9        | 41.9        | 56.2        | 63.1        | 66.0        |
| McDonald's restaurant               | 57.1        | 60.6        | 60.6        | 100.0       | 98.0        |
| IKEA stores                         | 99.0        | 99.0        | 100.0       | 100.0       | 99.5        |
| Gender parity                       | 62.1        | 64.0        | 70.4        | 82.8        | 77.3        |
| Human capital                       | 62.6        | 62.6        | 70.4        | 70.4        | 0.0         |
| Civil liberties                     | 72.4        | 76.4        | 92.1        | 92.6        | 93.6        |
| Embassies                           | 66.0        | 86.2        | 98.5        | 99.5        | 93.1        |
| UN peace keeping missions           | 100.0       | 100.0       | 100.0       | 100.0       | 100.0       |
| International NGOs                  | 0.0         | 0.0         | 0.0         | 97.5        | 100.0       |
| International organisations         | 2.0         | 2.0         | 96.1        | 98.5        | 99.5        |
| International treaties              | 98.0        | 98.0        | 98.0        | 98.0        | 98.0        |
| Treaty partner diversity            | 100         | 100         | 100         | 100         | 100         |
| <i>Mean</i>                         | <i>40.4</i> | <i>47.8</i> | <i>66.6</i> | <i>85.7</i> | <i>81.5</i> |
| <i>Std</i>                          | <i>36.2</i> | <i>37.8</i> | <i>32.4</i> | <i>16.5</i> | <i>25.0</i> |

Notes: Coverage ratios refer to the share of countries for which the observations for the variable are available (in percent).

Table A.3: Weights of variables for selected years

| Globalisation Index, de facto                |      |      |      |      |      | Globalisation Index, de jure                |      |      |      |      |      |
|----------------------------------------------|------|------|------|------|------|---------------------------------------------|------|------|------|------|------|
| <i>Economic Globalisation, de facto</i>      | 1975 | 1985 | 1995 | 2005 | 2015 | <i>Economic Globalisation, de jure</i>      | 1975 | 1985 | 1995 | 2005 | 2015 |
| <i>Trade Globalisation, de facto</i>         |      |      |      |      |      | <i>Trade Globalisation, de jure</i>         |      |      |      |      |      |
| Trade in goods                               | 38.3 | 38.8 | 40.0 | 38.0 | 38.7 | Trade regulations                           | 29.6 | 25.0 | 19.5 | 21.7 | 26.8 |
| Trade in services                            | 41.9 | 42.1 | 42.3 | 43.8 | 44.9 | Trade taxes                                 | 33.5 | 31.2 | 30.3 | 27.8 | 24.7 |
| Trade partner diversity                      | 19.8 | 19.1 | 17.7 | 18.2 | 16.4 | Tariffs                                     | 20.1 | 22.7 | 25.1 | 26.7 | 25.3 |
| <i>Financial Globalisation, de facto</i>     |      |      |      |      |      | <i>Financial Globalisation, de jure</i>     |      |      |      |      |      |
| Foreign direct investment                    | 16.5 | 17.2 | 22.9 | 29.6 | 26.9 | Investment restrictions                     | 33.0 | 38.9 | 33.9 | 35.2 | 32.9 |
| Portfolio investment                         | 8.1  | 9.0  | 7.2  | 14.1 | 16.5 | Capital account openness                    | 33.2 | 30.2 | 35.5 | 36.3 | 38.5 |
| International debt                           | 27.8 | 25.8 | 22.3 | 20.3 | 27.0 | International Investment Agreements         | 33.8 | 30.9 | 30.5 | 28.5 | 28.7 |
| International reserves                       | 10.9 | 10.6 | 9.6  | 0.1  | 2.5  | <i>Social Globalisation, de jure</i>        |      |      |      |      |      |
| International income payments                | 36.7 | 37.4 | 38.0 | 35.8 | 27.2 | <i>Interpersonal Globalisation, de jure</i> |      |      |      |      |      |
| <i>Social Globalisation, de facto</i>        |      |      |      |      |      | <i>Informational Globalisation, de jure</i> |      |      |      |      |      |
| <i>Interpersonal Globalisation, de facto</i> |      |      |      |      |      | <i>Informational Globalisation, de jure</i> |      |      |      |      |      |
| International voice traffic                  | 24.7 | 23.8 | 22.4 | 21.2 | 20.8 | Telephone subscriptions                     | 37.9 | 39.8 | 41.7 | 41.6 | 40.2 |
| Transfers                                    | 19.3 | 20.0 | 20.1 | 20.9 | 21.9 | Freedom to visit                            | 29.6 | 27.8 | 26.8 | 30.7 | 32.7 |
| International tourism                        | 20.3 | 19.9 | 20.3 | 20.2 | 21.1 | International airports                      | 32.5 | 32.4 | 31.6 | 27.7 | 27.1 |
| International students                       | 23.0 | 23.3 | 24.2 | 23.1 | 19.4 | <i>Cultural Globalisation, de jure</i>      |      |      |      |      |      |
| Migration                                    | 12.7 | 13.0 | 13.0 | 14.6 | 17.0 | <i>Cultural Globalisation, de jure</i>      |      |      |      |      |      |
| <i>Informational Globalisation, de facto</i> |      |      |      |      |      | <i>Political Globalisation, de jure</i>     |      |      |      |      |      |
| Used internet bandwidth                      | 29.9 | 29.2 | 29.1 | 33.1 | 36.9 | International organisations                 | 39.5 | 40.0 | 36.6 | 36.1 | 36.1 |
| International patents                        | 35.5 | 36.0 | 35.9 | 33.4 | 28.7 | International treaties                      | 39.8 | 38.9 | 37.8 | 34.6 | 33.5 |
| High technology exports                      | 34.6 | 34.8 | 35.0 | 33.5 | 34.4 | Treaty partner diversity                    | 20.7 | 21.1 | 25.6 | 29.3 | 30.4 |
| <i>Cultural Globalisation, de facto</i>      |      |      |      |      |      |                                             |      |      |      |      |      |
| Trade in cultural goods                      | 35.4 | 30.8 | 27.7 | 27.0 | 27.9 |                                             |      |      |      |      |      |
| Trade in personal services                   | 25.6 | 22.1 | 21.7 | 22.9 | 24.4 |                                             |      |      |      |      |      |
| International trademarks                     | 20.0 | 16.6 | 16.1 | 14.4 | 10.5 |                                             |      |      |      |      |      |
| McDonald's restaurant                        | 8.8  | 15.2 | 17.9 | 21.1 | 21.4 |                                             |      |      |      |      |      |
| IKEA stores                                  | 10.3 | 15.3 | 16.7 | 14.5 | 15.7 |                                             |      |      |      |      |      |
| <i>Political Globalisation, de facto</i>     |      |      |      |      |      |                                             |      |      |      |      |      |
| Embassies                                    | 37.7 | 37.7 | 35.8 | 34.2 | 36.4 |                                             |      |      |      |      |      |
| UN peace keeping missions                    | 23.0 | 22.5 | 26.9 | 28.9 | 25.9 |                                             |      |      |      |      |      |
| International NGOs                           | 39.3 | 39.8 | 37.2 | 36.9 | 37.7 |                                             |      |      |      |      |      |

Notes: Weights in percent for selected years. Weights for the individual variables are time variant. Overall indices for each aggregation level are calculated by the average of the respective de facto and de jure indices. The weights for all years are available on the website: [www.kof.ethz.ch/globalisation](http://www.kof.ethz.ch/globalisation).

Figure A.1: Robustness of KOF Globalisation Index calculated with time-varying and constant variable weights

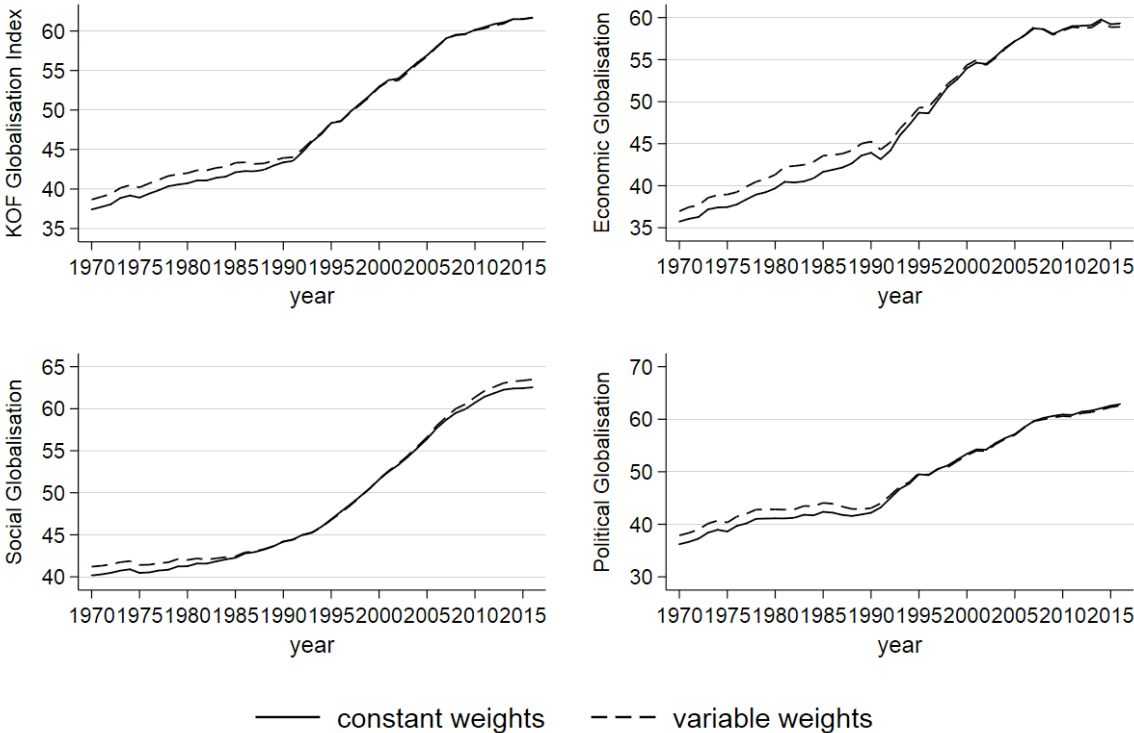

Figure A.2: Overlap statistics of KOF Globalisation Index calculated with time-varying and constant variable weights

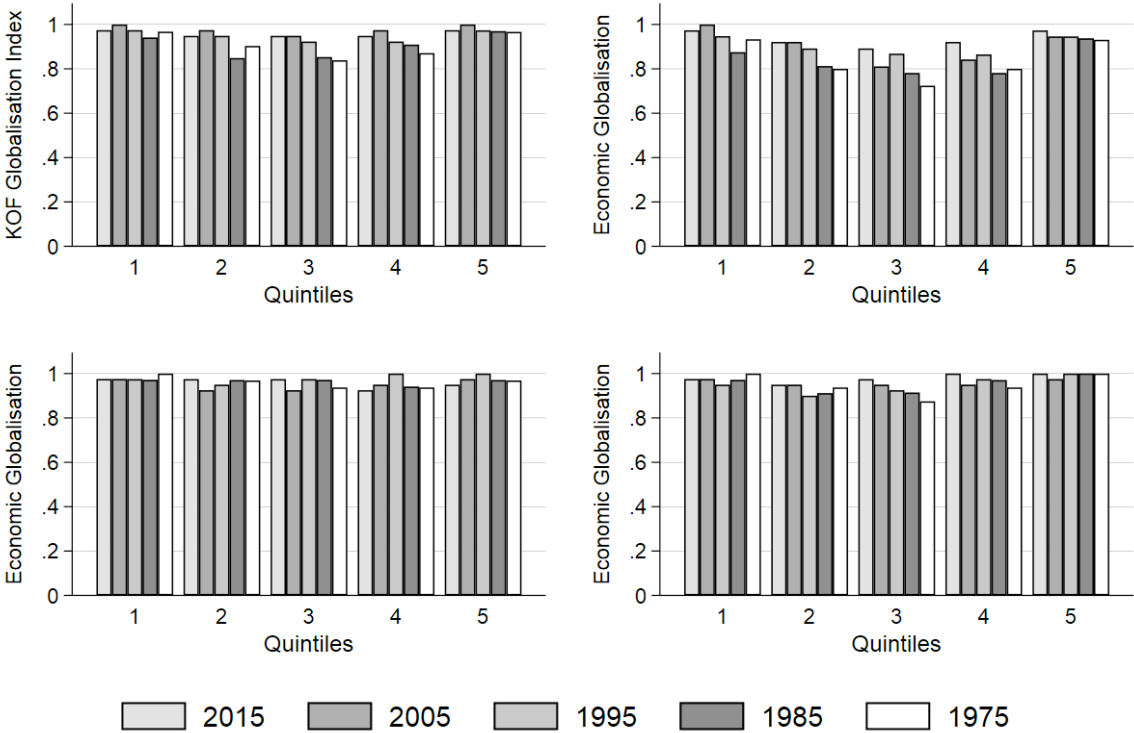

Figure A.3: Robustness of the KOF Globalisation Index with and without the cultural globalization dimension

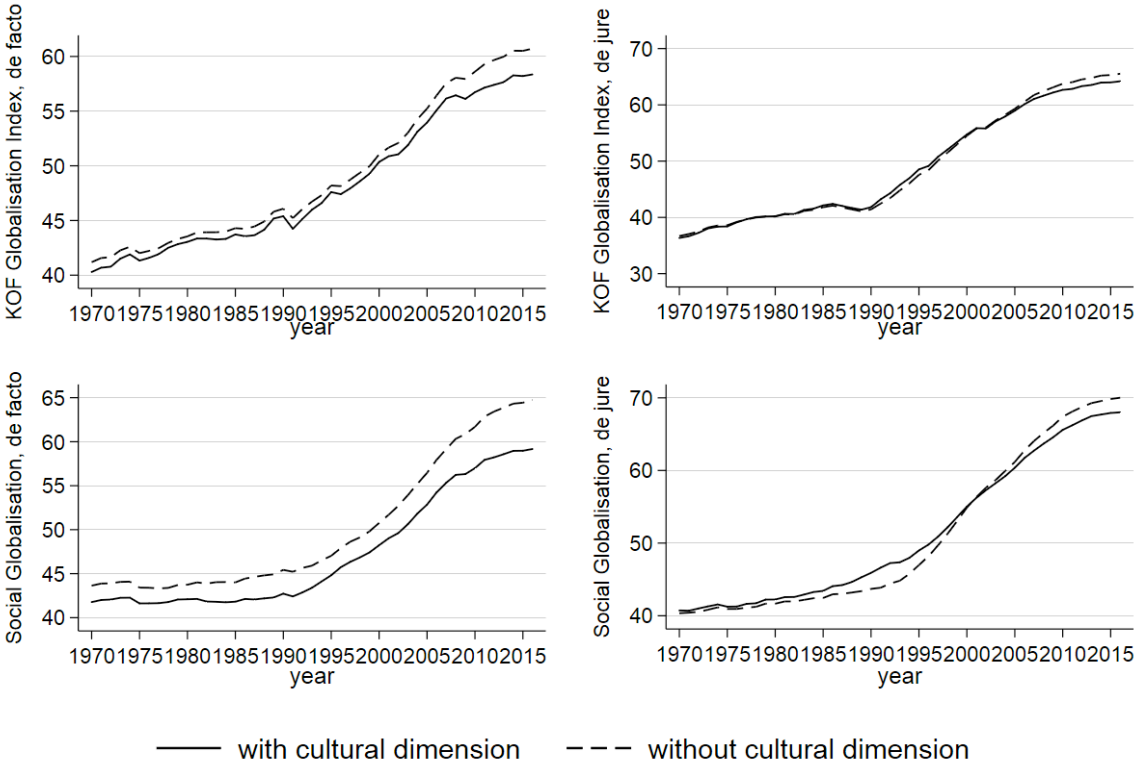

Figure A.4: Overlap statistics of KOF Globalisation Index with and without the cultural globalization dimension

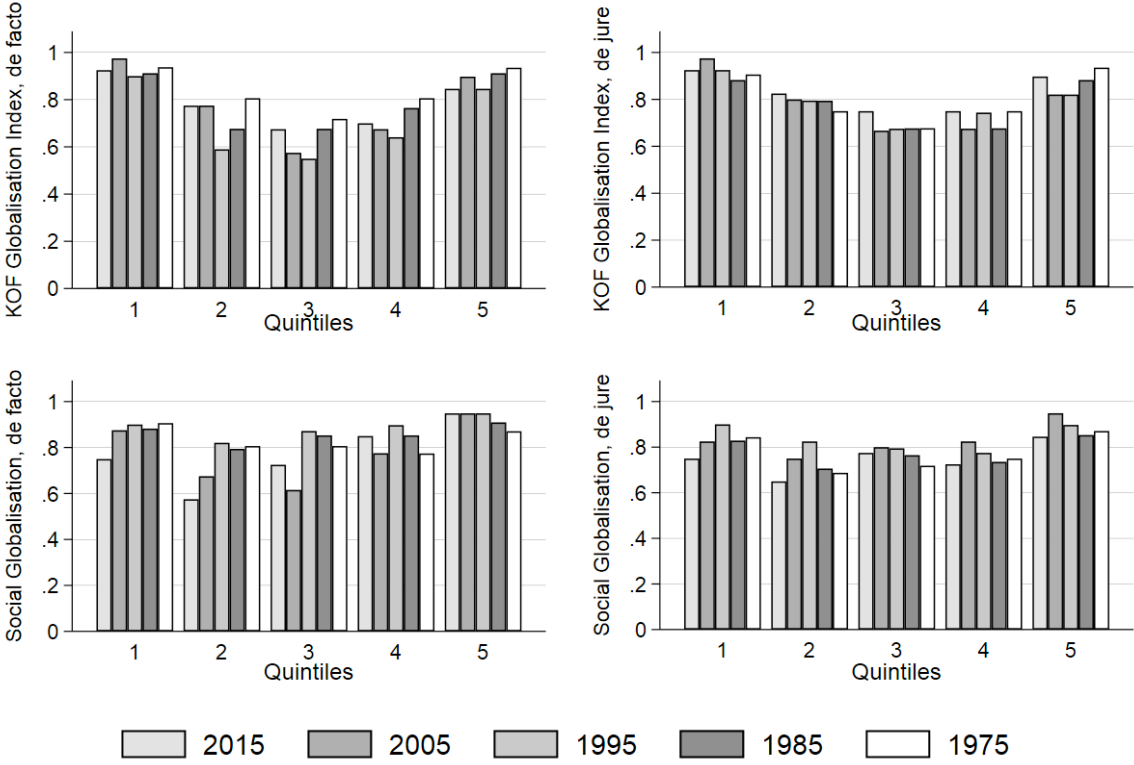

## References

- Chinn, M. and Ito, H. (2006). What Matters for Financial Development? Capital Controls, Institutions, and Interactions. *Journal of Development Economics*, 81(1).
- Chinn, M. and Ito, H. (2008). A New Measure of Financial Openness. *Journal of Comparative Policy Analysis*, 10(3).
- Czaika, M., de Haas, H., and Villares-Varela, M. (2018) The Global Evolution of Travel Visa Regimes. *Population and Development Review*, 44(3): 589-622.
- Egger, P. and Larch M. (2008). Interdependent Preferential Trade Agreement Memberships: An Empirical Analysis. *Journal of International Economics*, 76(2).
- Feenstra, R. C., Inklaar, R. and Timmer, M. P. (2015). The Next Generation of the Penn World Table, *American Economic Review*, 105(10): 3150-3182.
- Freedom House (2018a). Freedom of the Press 2018.
- Freedom House (2018b). Freedom in the World 2018.
- Gwartney, J., Lawson, R., and Hall, J. (2018). Economic Freedom of the World.
- International Air Transport Association (IATA) (2018). Travel Information Manual (TIM).
- International Civil Aviation Organization (ICAO) (2018). *Aerodrome statistics*.
- International Labour Organization (2018a). *ILOSTAT database*.
- International Monetary Fund (2018a). *Direction of Trade Statistics (DOTS)*. Washington DC.
- International Monetary Fund (2018b). *International Investment Position (IIP)*. Washington DC.
- International Monetary Fund (2018c). *Balance of Payments Statistics (BOPS)*. Washington DC.
- International Telecommunications Union (ITU) (2018). *World Telecommunication and ICT Indicators database*.
- Lane, P. R. and Milesi-Ferretti, G. M. (2018). The External Wealth of Nations Revisited; International Financial Integration in the Aftermath of the Global Financial Crisis. *IMF Economic Review*, 66(1): 189–222.
- UNESCO (2009). *The 2009 UNESCO Framework for Cultural Statistics (FCS)*. UNESCO.
- UNCTAD (2018). *Investment Policy Hub*.
- World Bank (2018). *World Development Indicators (WDI)*. Washington DC.
